# Supplementary material for: Maternal genetic variants in kinesin motor domains prematurely increase egg aneuploidy
Source: bioRxiv or medRxiv preprint supplement (doi:10.1101/2024.07.04.24309950), 2024-07-05

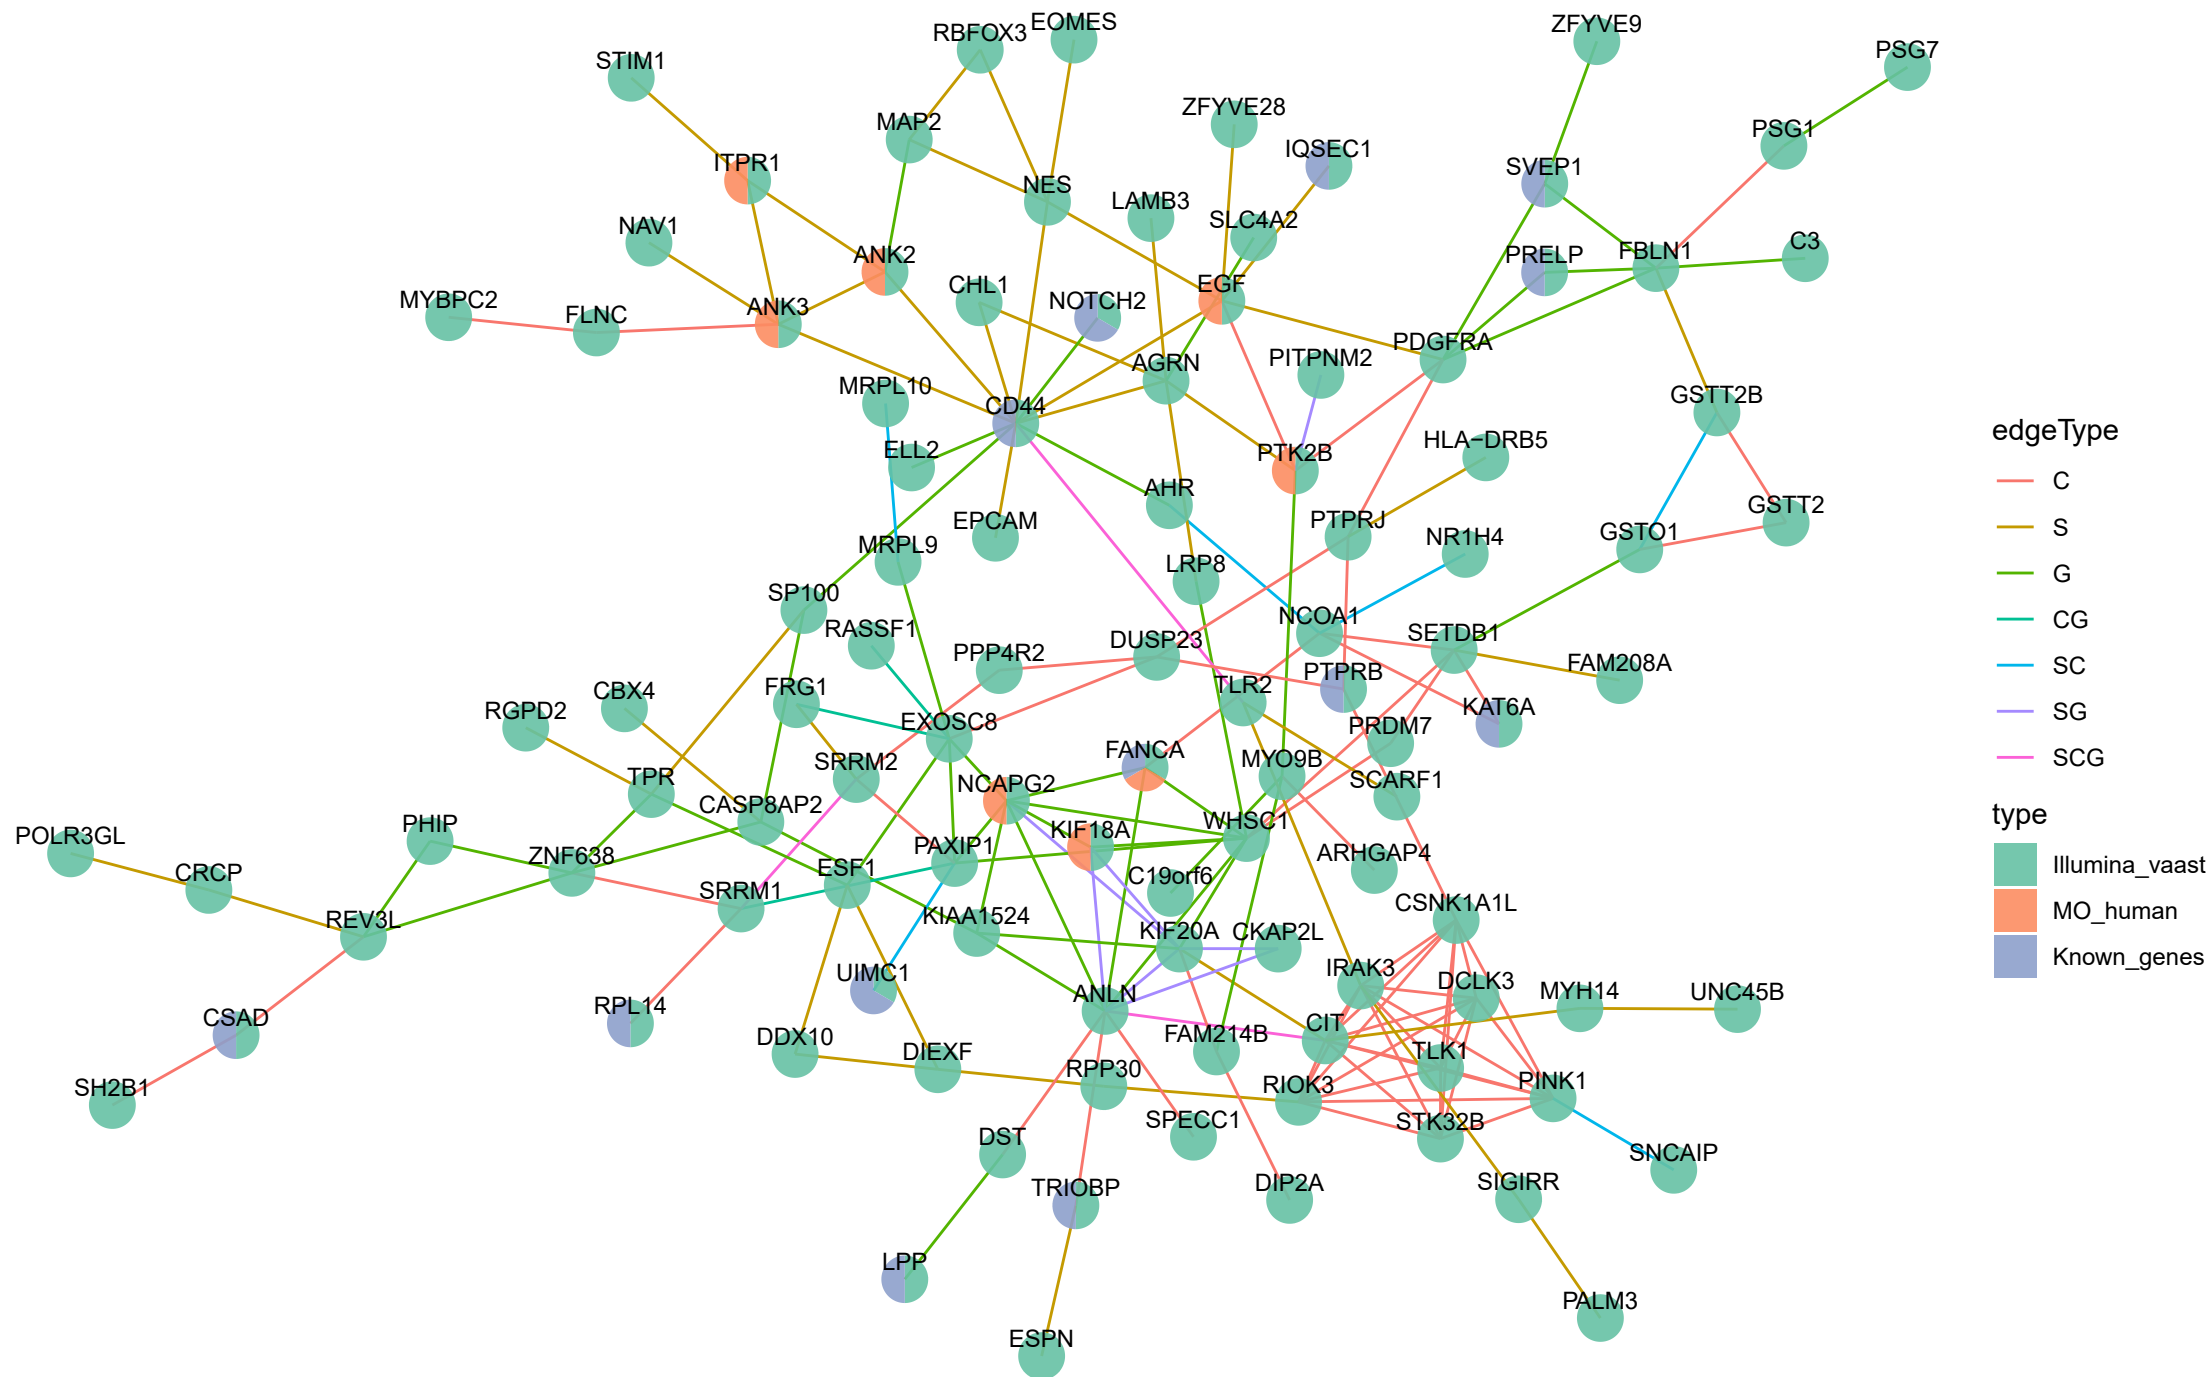

Supplement: Supplementary file [file media-1.pdf]
