# Supplementary material for: Maternal genetic variants in kinesin motor domains prematurely increase egg aneuploidy
Source: bioRxiv or medRxiv preprint supplement (doi:10.1101/2024.07.04.24309950), 2024-07-05

**A**

KIF20A

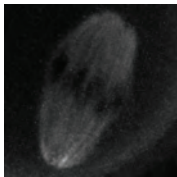

Tubulin

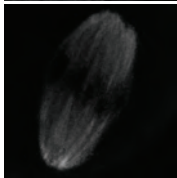

KIF20A  
Tubulin  
DNA

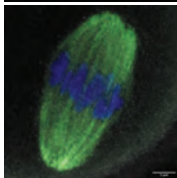

**B**

KIF18A

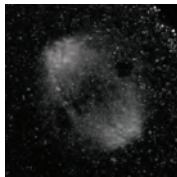

Tubulin

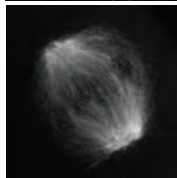

KIF18A  
Tubulin  
DNA

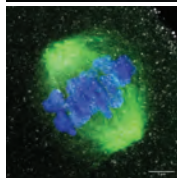

Supplement: Supplementary file [file media-2.pdf]
