# Supplementary material for: Maternal genetic variants in kinesin motor domains prematurely increase egg aneuploidy
Source: bioRxiv or medRxiv preprint supplement (doi:10.1101/2024.07.04.24309950), 2024-07-05
Supplement: Supplementary file [file media-5.pdf]

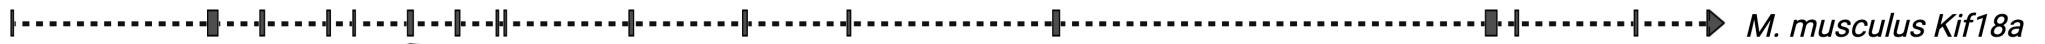

...CTGAGAGGGCCAGTGTTCGGGTGCTAAAGGG **TCA** CGATTTGTAGAAGGCACAAATATTAACAA... **gDNA (Targeted Nucleotides)**  
                  CCAGTGTTCGGGTGCTAAAGGG                  **sgRNA + PAM**  
...TTTGTTAATATTTGTGCCTTCTACAAATCGTG **CGC** CTTTAGCACCCGAAACACTGGCCCTCTCAG... **Donor DNA (Edited Nucleotides)**
